# Supplementary material for: Landscape of alternative splicing and polyadenylation during growth and development of muscles in pigs
Source: PubMed Central journal article supplement — Commun Biol. 2024 Dec 3;7:1607. doi: 10.1038/s42003-024-07332-w (PMC11614907; doi:10.1038/s42003-024-07332-w), 2024-12-03

Supplementary Figure 1 Uncropped and unedited gel images of Fig.2h

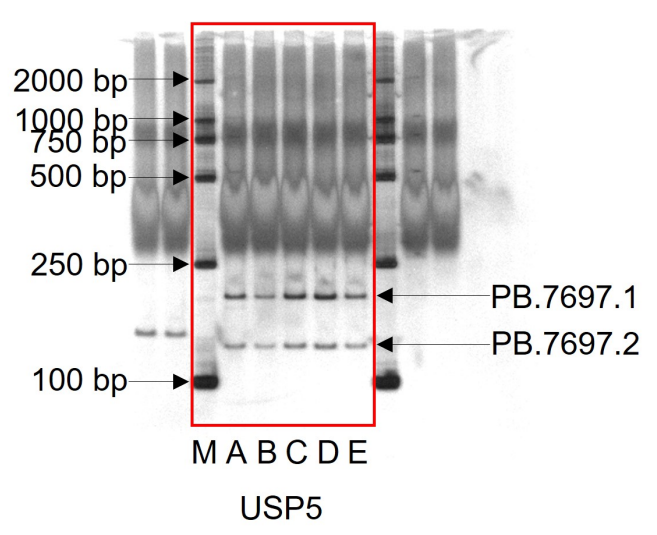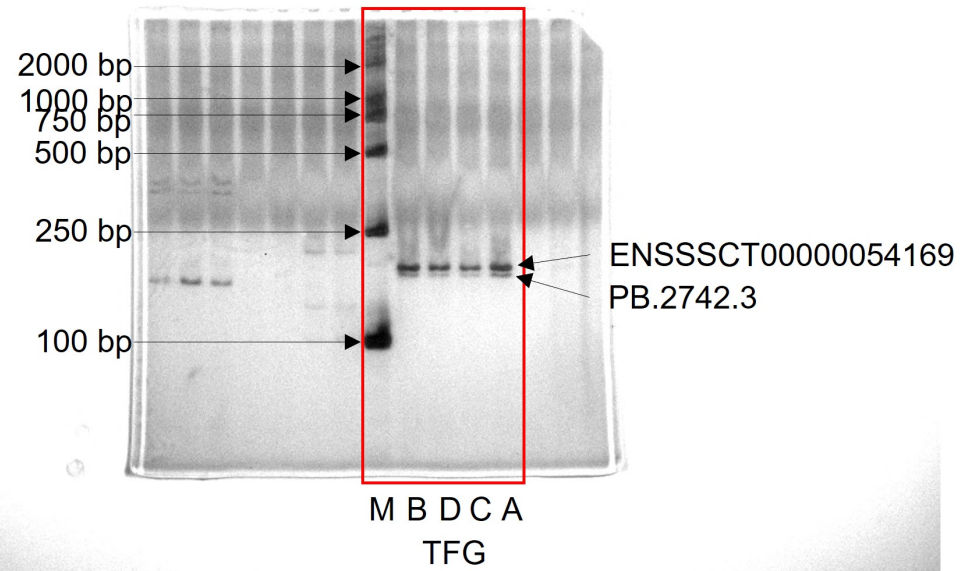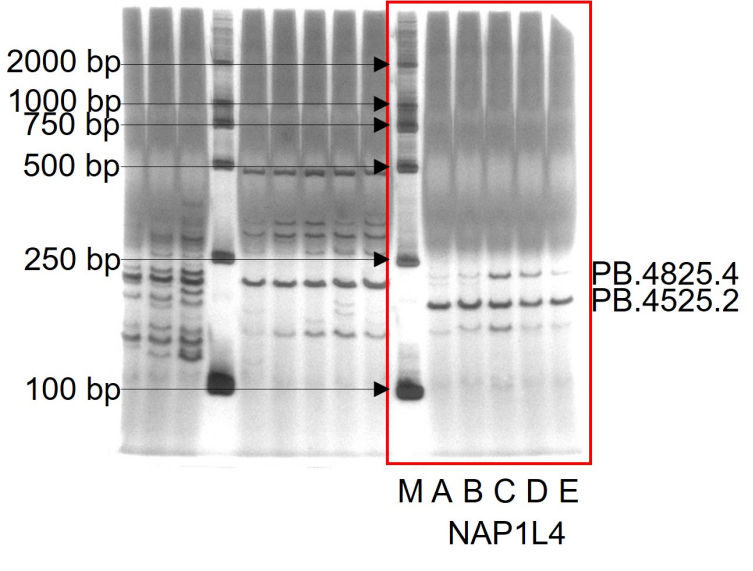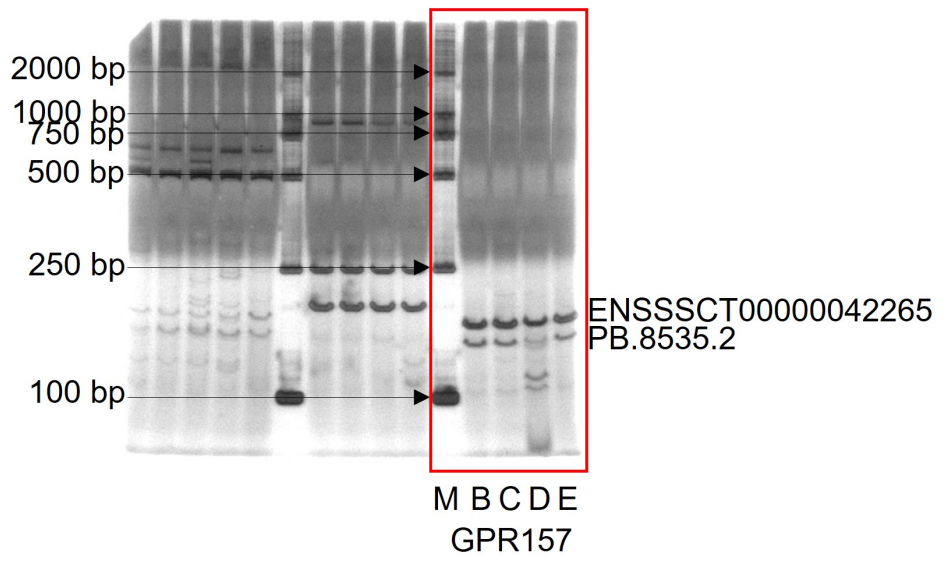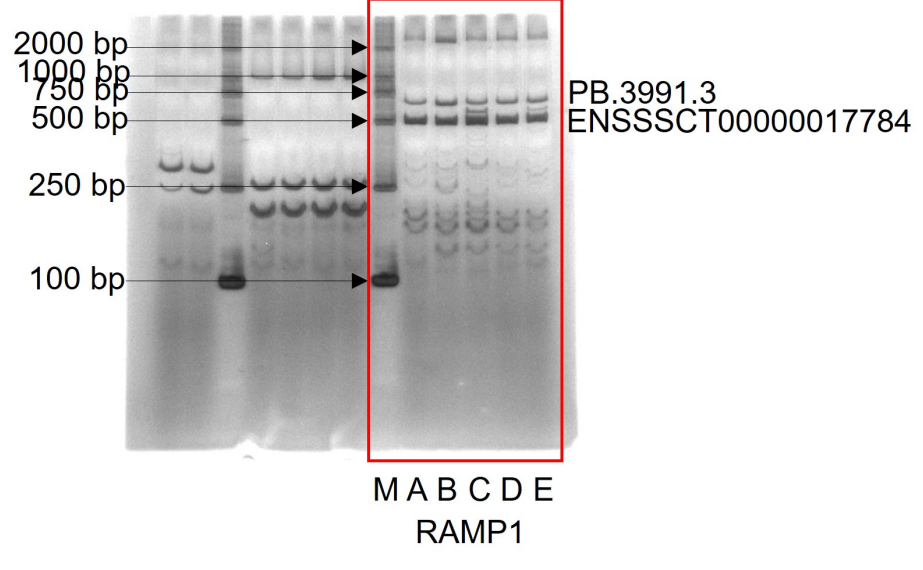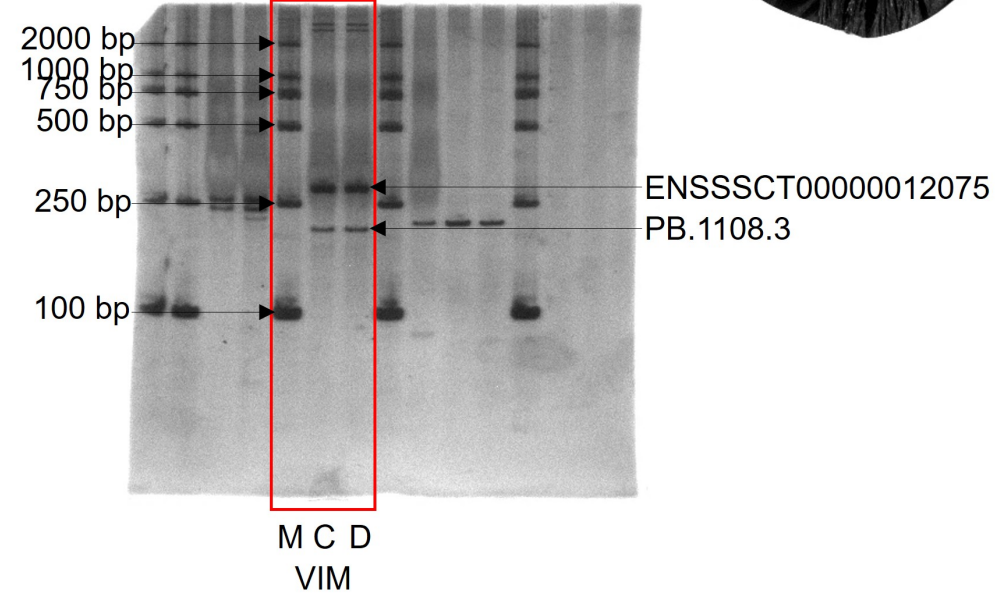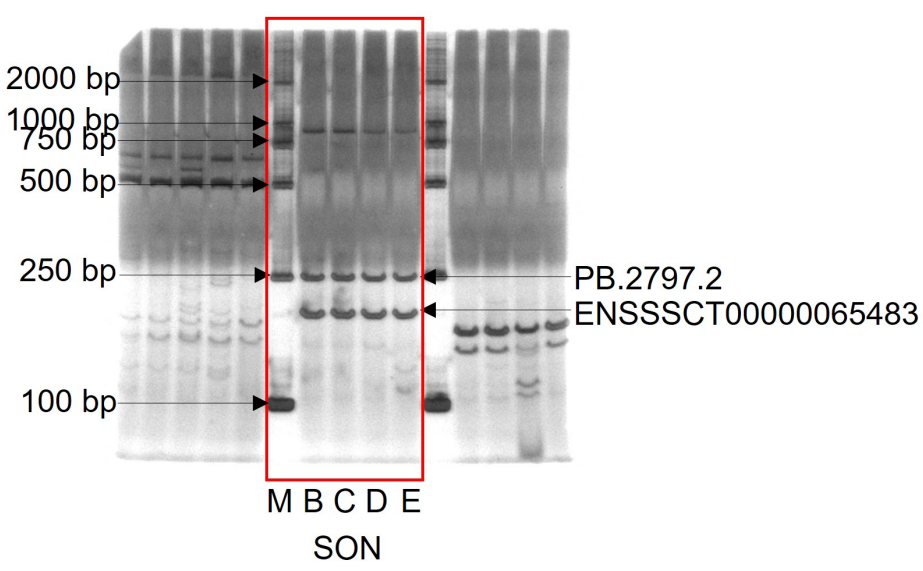

Supplementary Figure 2 Uncropped and unedited gel images of Fig. 4d

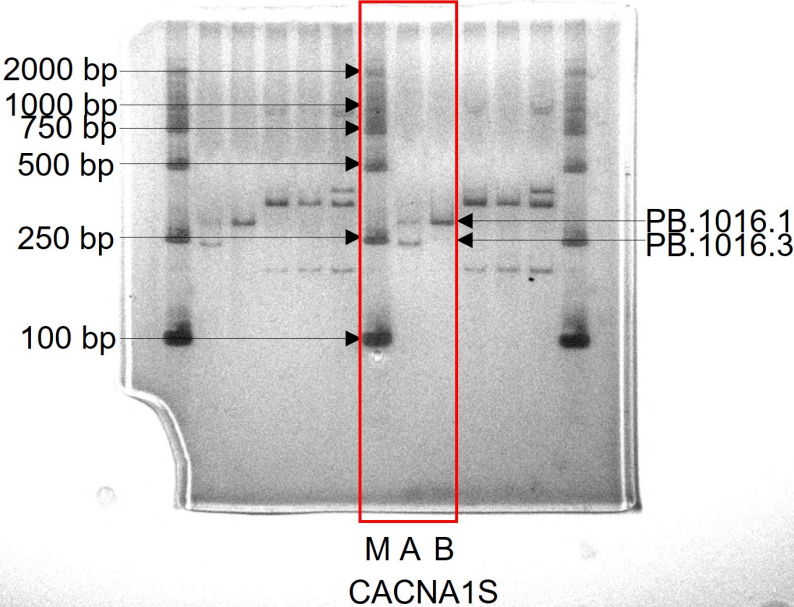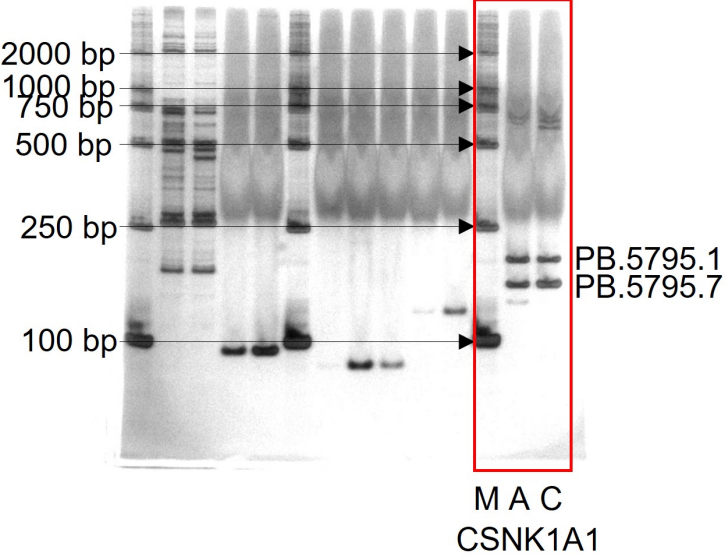

Supplement: 42003_2024_7332_MOESM2_ESM.pdf [file 42003_2024_7332_MOESM2_ESM.pdf]
