# Supplementary material for: Landscape of alternative splicing and polyadenylation during growth and development of muscles in pigs
Source: PubMed Central journal article supplement — Commun Biol. 2024 Dec 3;7:1607. doi: 10.1038/s42003-024-07332-w (PMC11614907; doi:10.1038/s42003-024-07332-w), 2024-12-03
Supplement: 42003_2024_7332_MOESM3_ESM.pdf [file 42003_2024_7332_MOESM3_ESM.pdf]

## **Description of Additional Supplementary Files**

File name: Supplementary Data 1-6

Description: genome annotation files

File name: Supplementary Data 7-8

Description: Numerical source data of Fig.3g and 6g

File name: Supplementary Data 9

Description: Supplementary Tables 1-11
