# Supplementary material for: Landscape of alternative splicing and polyadenylation during growth and development of muscles in pigs
Source: PubMed Central journal article supplement — Commun Biol. 2024 Dec 3;7:1607. doi: 10.1038/s42003-024-07332-w (PMC11614907; doi:10.1038/s42003-024-07332-w), 2024-12-03
Supplement: 42003_2024_7332_MOESM5_ESM.pdf [file 42003_2024_7332_MOESM5_ESM.pdf]

## Reporting Summary

Nature Portfolio wishes to improve the reproducibility of the work that we publish. This form provides structure for consistency and transparency in reporting. For further information on Nature Portfolio policies, see our [Editorial Policies](#) and the [Editorial Policy Checklist](#).

### Statistics

For all statistical analyses, confirm that the following items are present in the figure legend, table legend, main text, or Methods section.

n/a | Confirmed

- The exact sample size ( $n$ ) for each experimental group/condition, given as a discrete number and unit of measurement
- A statement on whether measurements were taken from distinct samples or whether the same sample was measured repeatedly
- The statistical test(s) used AND whether they are one- or two-sided  
*Only common tests should be described solely by name; describe more complex techniques in the Methods section.*
- A description of all covariates tested
- A description of any assumptions or corrections, such as tests of normality and adjustment for multiple comparisons
- A full description of the statistical parameters including central tendency (e.g. means) or other basic estimates (e.g. regression coefficient) AND variation (e.g. standard deviation) or associated estimates of uncertainty (e.g. confidence intervals)
- For null hypothesis testing, the test statistic (e.g.  $F$ ,  $t$ ,  $r$ ) with confidence intervals, effect sizes, degrees of freedom and  $P$  value noted  
*Give  $P$  values as exact values whenever suitable.*
- For Bayesian analysis, information on the choice of priors and Markov chain Monte Carlo settings
- For hierarchical and complex designs, identification of the appropriate level for tests and full reporting of outcomes
- Estimates of effect sizes (e.g. Cohen's  $d$ , Pearson's  $r$ ), indicating how they were calculated

*Our web collection on [statistics for biologists](#) contains articles on many of the points above.*

### Software and code

Policy information about [availability of computer code](#)

Data collection

RNA-Seq data were sequenced with PE150 mode on Illumina NovaSeq6000 platform.  
Full-length cDNA data were processed with the Iso-Seq3 pipeline (v3.4.0; <https://github.com/PacificBiosciences/IsoSeq>).  
qPCR analysis were using QuantStudio 3.  
Dual luciferase reporter analysis were using Infinite F50.

## Data analysis

The raw subreads were processed with the Iso-Seq3 pipeline (v3.4.0). CCS reads generator (--min-rq 0.9 --min-passes 3 -j 6 --min-length 200). cDNA primers and poly(A) tails were removed with Lima (v2.1.0) and IsoSeq3 (v3.4.0). The FLNC reads from the same transcript were clustered with SMRTLink software (v10.1). The high-quality consensus isoforms were aligned with minimap2 (v2.20-r1061). RNA-seq data were used to extend the data of reference genome with StringTie software (v2.1.6, -eB -G). cDNA\_Cupcake (v28.0.0) was used to filter out reads and to merge reads. SQANTI3 (v5.1.1) filter script and aggregate the reads. BUSCO (v3.0.2) was used to assess the integrity of the transcriptome. Protein-coding potential was predicted with SQANTI3 (v5.1.1). Clean reads obtained by RNA-Seq were mapped using HISAT2 (HISAT2 2.0.4, --dta -p 6 --max-intronlen 5000000). The uniquely mapped reads were assembled using StringTie software (v2.2.1, --merge -F 0.1 -T 0.1). DEGs were identified using DESeq2 1.30.1 (default: test="Wald", fitType="parametric"). The expression level of gene/transcript was provided by StringTie. Gene clustering was performed with Mfuzz (<http://mfuzz.sysbiolab.eu>). Scatter map was constructed with the OmicShare tools (<https://www.omicshare.com/tools>). Heatmap and venn diagram were plotted with online tools (<http://www.bioinformatics.com.cn/>). PPI analysis was performed with string (<https://cn.string-db.org/>, v12.0) and were visualized with cytoscape (v3.9.1). Astalavista (v3.2) was used to analyze the basic AS types. The AS events were compared by using rMATS (v4.0.2). The rMATS (v4.0.2) statistical is used to measure the p-value of the differences by likelihood-ratio test. In AS analysis, the default threshold for rMATS screening is  $|\Delta\psi| > c$  (c=0.0001). APA sites were processed with TAPIS pipeline (v1.1.3) ([https://bitbucket.org/comp\\_bio/tapis/overview](https://bitbucket.org/comp_bio/tapis/overview)). WGCNA was performed with ImageGP (<http://www.ehbio.com/ImageGP/>). The differences of qPCR and Dual luciferase reporter analysis were compared with unpaired t-test by using GraphPad Prism 9.0.

For manuscripts utilizing custom algorithms or software that are central to the research but not yet described in published literature, software must be made available to editors and reviewers. We strongly encourage code deposition in a community repository (e.g. GitHub). See the Nature Portfolio [guidelines for submitting code & software](#) for further information.

## Data

Policy information about [availability of data](#)

All manuscripts must include a [data availability statement](#). This statement should provide the following information, where applicable:

- Accession codes, unique identifiers, or web links for publicly available datasets
- A description of any restrictions on data availability
- For clinical datasets or third party data, please ensure that the statement adheres to our [policy](#)

The datasets presented in this study have been deposited to the National Genomics Data Center (NGDC, <https://ngdc.cncb.ac.cn/>) with the dataset accession number CRA013591 (<https://bigd.big.ac.cn/gsa/browse/CRA013591>)

## Research involving human participants, their data, or biological material

Policy information about studies with [human participants or human data](#). See also policy information about [sex, gender \(identity/presentation\), and sexual orientation](#) and [race, ethnicity and racism](#).

|                                                                    |                                                                                                            |
|--------------------------------------------------------------------|------------------------------------------------------------------------------------------------------------|
| Reporting on sex and gender                                        | <input checked="" type="checkbox"/> No human participants or human data were involved in this study.       |
| Reporting on race, ethnicity, or other socially relevant groupings | <input checked="" type="checkbox"/> NO reporting on race, ethnicity, or other socially relevant groupings. |
| Population characteristics                                         | <input checked="" type="checkbox"/> Population characteristics are not relevant for this study.            |
| Recruitment                                                        | <input checked="" type="checkbox"/> Recruitment is not relevant for this study.                            |
| Ethics oversight                                                   | <input checked="" type="checkbox"/> Ethics oversight is not relevant for this study.                       |

Note that full information on the approval of the study protocol must also be provided in the manuscript.

## Field-specific reporting

Please select the one below that is the best fit for your research. If you are not sure, read the appropriate sections before making your selection.

Life sciences  Behavioural & social sciences  Ecological, evolutionary & environmental sciences

For a reference copy of the document with all sections, see [nature.com/documents/nr-reporting-summary-flat.pdf](https://www.nature.com/documents/nr-reporting-summary-flat.pdf)

## Life sciences study design

All studies must disclose on these points even when the disclosure is negative.

|                 |                                                                                                                                                                                                                               |
|-----------------|-------------------------------------------------------------------------------------------------------------------------------------------------------------------------------------------------------------------------------|
| Sample size     | <input checked="" type="checkbox"/> 15 Min pigs, a Chinese local pig breed, were both male used here. The longissimus dorsi muscles were collected from pigs at 7-, 30-, 60-, 90- and 210-d-old, each with three individuals. |
| Data exclusions | <input checked="" type="checkbox"/> No exclusion                                                                                                                                                                              |
| Replication     | <input checked="" type="checkbox"/> All attempts at replication were successful                                                                                                                                               |

Randomization Allocation was random

Blinding Blinding is not relevant for this study

## Reporting for specific materials, systems and methods

We require information from authors about some types of materials, experimental systems and methods used in many studies. Here, indicate whether each material, system or method listed is relevant to your study. If you are not sure if a list item applies to your research, read the appropriate section before selecting a response.

### Materials & experimental systems

### Methods

n/a Involved in the study

Antibodies

Eukaryotic cell lines

Palaeontology and archaeology

Animals and other organisms

Clinical data

Dual use research of concern

Plants

n/a Involved in the study

ChIP-seq

Flow cytometry

MRI-based neuroimaging

## Eukaryotic cell lines

Policy information about [cell lines and Sex and Gender in Research](#)

Cell line source(s) PK-15 cells (RRID: CVCL\_2160) : from Cellosaurus.

Authentication NO

Mycoplasma contamination The cell lines were tested negative for mycoplasma contamination.

Commonly misidentified lines (See [ICLAC](#) register) NO

## Animals and other research organisms

Policy information about [studies involving animals; ARRIVE guidelines](#) recommended for reporting animal research, and [Sex and Gender in Research](#)

Laboratory animals Min pigs, a Chinese local pig breed. The pigs were obtained from the Institute of Animal Husbandry, Heilongjiang Academy of Agricultural Sciences, Harbin, China. The ages were 7-, 30-, 60-, 90- and 210-d-old.

Wild animals No wild animals

Reporting on sex Male

Field-collected samples The study did not involve samples collected from the field

Ethics oversight Laboratory Animal Welfare and Ethics Committee of Northeast Agricultural University

Note that full information on the approval of the study protocol must also be provided in the manuscript.

## Plants

Seed stocks No plants

Novel plant genotypes No plants

Authentication No authentication
